# Supplementary material for: FXYD6: a novel therapeutic target toward hepatocellular carcinoma
Source: Protein Cell. 2014 Apr 10;5(7):532–43. doi: 10.1007/s13238-014-0045-0 (PMC4085285; doi:10.1007/s13238-014-0045-0)
Supplement: Supplementary file 1 — Supplementary material 1 (PDF 297 kb) [file 13238_2014_45_MOESM1_ESM.pdf]

**Supplemental Material**

**FXYD6: a novel therapeutic target toward hepatocellular carcinoma**

Qian Gao, Xiongfei Chen, Hongxia Duan, Zhaoqing Wang, Jing Feng, Dongling Yang,

Lina Song, Ningxin Zhou\* and Xiyun Yan\*

\* Correspondence should be addressed to.

Professor Ningxin Zhou, Institute of Hepatobiliary Gastrointestinal Disease, General Hospital of PLA Second Artillery, 16 Xijiekouwai Avenue, Xicheng, Beijing 100088, China. E-mail: zhounx301@163.com.

Professor Xiyun Yan, Institute of Biophysics, Chinese Academy of Sciences, 15 Datun Road, Beijing 100101, China. Email: yanxy@ibp.ac.cn. Fax: 086-10-64888584

**Inventory of Supplemental Material:**

1. Figure S1, Related to Figure 3. Co-localization of FXYD6 and Na<sup>+</sup>/K<sup>+</sup>-ATPase in the HCC tissues.
2. Table S1, Related to Table 1. The Scores of Immunohistochemistry Staining.

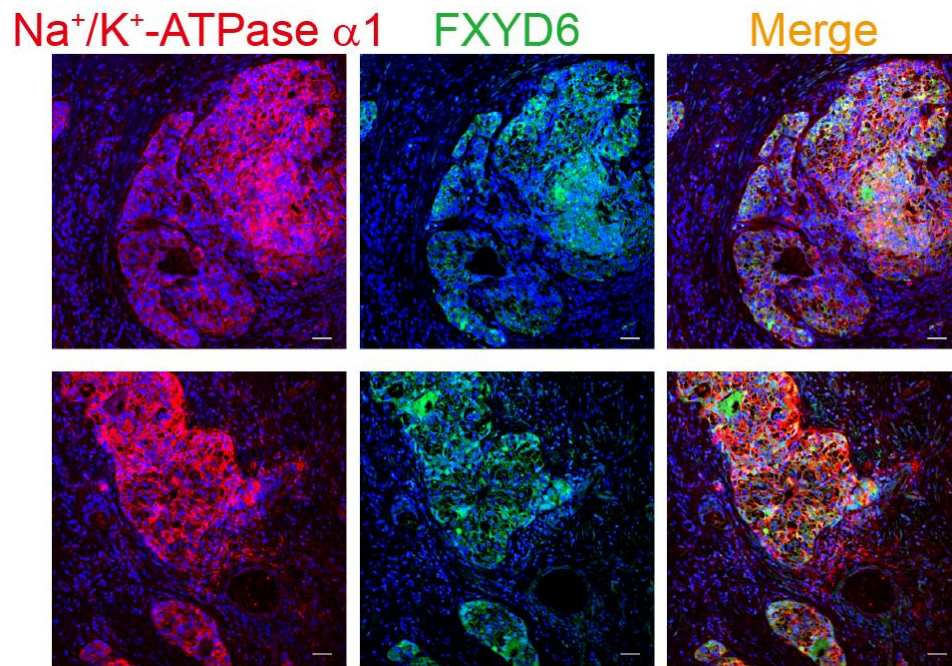

**Figure S1.** Co-localization of FXYD6 and  $\text{Na}^+/\text{K}^+$ -ATPase in the HCC tissues.

Two hepatocellular carcinoma tissues from different patients were used for double immunostaining with anti-FXYD6 antibody (green) and anti- $\text{Na}^+/\text{K}^+$ -ATPase  $\alpha 1$  (red). The bar represents 40  $\mu\text{m}$ .

Table S1. The Scores of Immunohistochemistry Staining

| Type of tissues |                             | Total | Positive<br>(Score 4-12) | Score 0-3 | Score 4-6 | Score 7-9 | Score 10-12 |
|-----------------|-----------------------------|-------|--------------------------|-----------|-----------|-----------|-------------|
| Liver           | Hepatocellular carcinoma    | 56    | 54                       | 2         | 8         | 27        | 19          |
|                 | Normal tissue               | 35    | 11                       | 24        | 7         | 1         | 3           |
| Thyroid         | Carcinoma                   | 17    | 17                       | 0         | 3         | 5         | 9           |
|                 | Normal tissue               | 6     | 2                        | 4         | 2         | 0         | 0           |
| Prostate        | Adenocarcinoma              | 13    | 9                        | 4         | 2         | 5         | 2           |
|                 | Normal tissue               | 6     | 1                        | 5         | 1         | 0         | 0           |
| Colon           | Adenocarcinoma              | 17    | 17                       | 0         | 0         | 4         | 13          |
|                 | Normal tissue               | 6     | 4                        | 2         | 0         | 0         | 4           |
| Cerebrum        | Astrocytoma                 | 17    | 17                       | 0         | 12        | 4         | 1           |
|                 | Normal tissue               | 7     | 7                        | 0         | 3         | 3         | 1           |
| Uterus          | Adenocarcinoma              | 20    | 20                       | 0         | 6         | 4         | 10          |
|                 | Normal tissue               | 5     | 5                        | 0         | 0         | 1         | 4           |
| Bladder         | Transitional cell carcinoma | 20    | 18                       | 2         | 2         | 3         | 13          |
|                 | Normal tissue               | 1     | 1                        | 0         | 0         | 0         | 1           |
| Ovary           | Carcinoma                   | 30    | 20                       | 10        | 7         | 7         | 6           |
|                 | Normal tissue               | 6     | 4                        | 2         | 1         | 1         | 2           |
| Breast          | Carcinoma                   | 29    | 18                       | 11        | 9         | 9         | 0           |
|                 | Normal tissue               | 9     | 6                        | 3         | 1         | 3         | 2           |
| Testis          | Seminoma                    | 21    | 12                       | 9         | 5         | 6         | 1           |
|                 | Normal tissue               | 6     | 5                        | 1         | 3         | 1         | 1           |
| Lung            | Carcinoma                   | 25    | 14                       | 11        | 11        | 3         | 0           |
|                 | Normal tissue               | 1     | 1                        | 0         | 1         | 0         | 0           |
| Stomach         | Adenocarcinoma              | 18    | 9                        | 9         | 4         | 4         | 1           |
|                 | Normal tissue               | 5     | 3                        | 2         | 1         | 2         | 0           |
| Pancreas        | Adenocarcinoma              | 15    | 5                        | 10        | 2         | 2         | 1           |
|                 | Normal tissue               | 6     | 3                        | 3         | 1         | 2         | 0           |
